# Supplementary material for: Effects of First Feed Administration on Small Intestinal Development and Plasma Hormones in Broiler Chicks
Source: MDPI journal article supplement (doi:10.3390/ani10091568), 2020-09-03
Supplement: s1 [file s1]

**Table S1.** Effects of feed deprivation on absolute weights of the small intestine in broiler chicks (g)

| Time after placement (h) | Time of feed deprivation (h) |                    |                   | SEM   |
|--------------------------|------------------------------|--------------------|-------------------|-------|
|                          | 0                            | 24                 | 48                |       |
| 0                        | 0.974                        | 0.981              | 0.975             | 0.052 |
| 24                       | 1.97 <sup>a</sup>            | 1.55 <sup>b</sup>  | 1.48 <sup>b</sup> | 0.119 |
| 48                       | 3.67 <sup>a</sup>            | 3.34 <sup>b</sup>  | 1.78 <sup>c</sup> | 0.106 |
| 72                       | 5.61 <sup>a</sup>            | 5.14 <sup>a</sup>  | 3.92 <sup>b</sup> | 0.309 |
| 120                      | 8.97 <sup>a</sup>            | 8.05 <sup>ab</sup> | 6.84 <sup>b</sup> | 0.556 |
| 168                      | 11.91 <sup>a</sup>           | 10.53 <sup>b</sup> | 9.21 <sup>c</sup> | 0.432 |

Mean values with their SEM (n 6). a,b,c Mean values within a row with unlike letters were significantly different (P < 0.05).

**Table S2.** Effects of feed deprivation on relative weights to the small intestine in broiler chicks (%)

| Time after placement (h) | Time of feed deprivation (h) |                   |                   | SEM   |
|--------------------------|------------------------------|-------------------|-------------------|-------|
|                          | 0                            | 24                | 48                |       |
| 0                        | 2.16                         | 2.22              | 2.16              | 0.124 |
| 24                       | 4.29 <sup>a</sup>            | 3.60 <sup>b</sup> | 3.59 <sup>b</sup> | 0.211 |
| 48                       | 6.28 <sup>a</sup>            | 6.60 <sup>a</sup> | 4.47 <sup>b</sup> | 0.230 |
| 72                       | 8.36                         | 8.22              | 7.48              | 0.437 |
| 120                      | 10.04                        | 8.93              | 9.10              | 0.541 |
| 168                      | 10.30 <sup>a</sup>           | 9.40 <sup>b</sup> | 9.09 <sup>b</sup> | 0.330 |

Mean values with their SEM (n= 6). a,b Mean values within a row with unlike letters were significantly different (P < 0.05).

**Table S3.** Effects of feed deprivation on villus height of jejunum in broiler chicks (μm)

| Time after placement (h) | Time of feed deprivation (h) |                    |                    | SEM   |
|--------------------------|------------------------------|--------------------|--------------------|-------|
|                          | 0                            | 24                 | 48                 |       |
| 0                        | 342.9                        | 341.9              | 350.8              | 10.44 |
| 24                       | 502.8 <sup>a</sup>           | 400.6 <sup>b</sup> | 405.1 <sup>b</sup> | 15.20 |
| 48                       | 587.5 <sup>a</sup>           | 537.3 <sup>b</sup> | 523.3 <sup>b</sup> | 7.444 |
| 72                       | 702.1 <sup>a</sup>           | 602.4 <sup>b</sup> | 562.0 <sup>b</sup> | 23.66 |
| 120                      | 824.8 <sup>a</sup>           | 727.3 <sup>b</sup> | 652.0 <sup>c</sup> | 21.95 |
| 168                      | 906.1 <sup>a</sup>           | 865.3 <sup>b</sup> | 712.0 <sup>c</sup> | 13.00 |

Mean values with their SEM (n 3). a,b,c Mean values within a row with unlike letters were significantly different (P < 0.05).

**Table S4.** Effects of feed deprivation on villus height of ileum in broiler chicks (μm)

| Time after placement (h) | Time of feed deprivation (h) |                    |                    | SEM   |
|--------------------------|------------------------------|--------------------|--------------------|-------|
|                          | 0                            | 24                 | 48                 |       |
| 0                        | 244.1                        | 247.8              | 242.0              | 10.00 |
| 24                       | 427.7 <sup>a</sup>           | 333.0 <sup>b</sup> | 334.0 <sup>b</sup> | 27.77 |
| 48                       | 482.9 <sup>a</sup>           | 419.1 <sup>b</sup> | 381.0 <sup>c</sup> | 11.28 |
| 72                       | 474.2 <sup>a</sup>           | 500.1 <sup>a</sup> | 412.6 <sup>b</sup> | 11.77 |
| 120                      | 576.5 <sup>a</sup>           | 562.5 <sup>a</sup> | 458.2 <sup>b</sup> | 6.319 |
| 168                      | 732.9 <sup>a</sup>           | 636.0 <sup>b</sup> | 620.9 <sup>b</sup> | 14.03 |

Mean values with their SEM (n 3). a,b,c Mean values within a row with unlike letters were significantly different (P

< 0.05).

**Table S5.** Effects of feed deprivation on crypt depth of jejunum in broiler chicks (µm)

| Time after placement (h) | Time of feed deprivation (h) |                     |                    | SEM   |
|--------------------------|------------------------------|---------------------|--------------------|-------|
|                          | 0                            | 24                  | 48                 |       |
| 0                        | 37.97                        | 36.76               | 39.57              | 1.959 |
| 24                       | 59.30 <sup>a</sup>           | 51.10 <sup>b</sup>  | 50.37 <sup>b</sup> | 3.224 |
| 48                       | 75.93 <sup>a</sup>           | 62.47 <sup>ab</sup> | 58.70 <sup>b</sup> | 4.535 |
| 72                       | 88.60 <sup>a</sup>           | 78.80 <sup>ab</sup> | 71.57 <sup>b</sup> | 6.450 |
| 120                      | 119.0 <sup>a</sup>           | 104.8 <sup>ab</sup> | 100.0 <sup>b</sup> | 5.437 |
| 168                      | 128.9 <sup>a</sup>           | 120.2 <sup>ab</sup> | 114.4 <sup>b</sup> | 5.342 |

Mean values with their SEM (n 3). a,b Mean values within a row with unlike letters were significantly different (P < 0.05).

**Table S6.** Effects of feed deprivation on crypt depth of ileum in broiler chicks (µm)

| Time after placement (h) | Time of feed deprivation (h) |                     |                    | SEM   |
|--------------------------|------------------------------|---------------------|--------------------|-------|
|                          | 0                            | 24                  | 48                 |       |
| 0                        | 52.67                        | 53.93               | 51.97              | 3.699 |
| 24                       | 74.21 <sup>a</sup>           | 62.37 <sup>b</sup>  | 64.60 <sup>b</sup> | 2.730 |
| 48                       | 85.33 <sup>a</sup>           | 80.77 <sup>ab</sup> | 72.70 <sup>b</sup> | 3.690 |
| 72                       | 103.6 <sup>a</sup>           | 93.74 <sup>b</sup>  | 87.02 <sup>b</sup> | 2.490 |
| 120                      | 109.7                        | 100.6               | 98.20              | 5.729 |
| 168                      | 123.4                        | 115.6               | 113.9              | 6.606 |

Mean values with their SEM (n 3). a,b Mean values within a row with unlike letters were significantly different (P < 0.05).

**Table S7.** Effects of feed deprivation on VCR of jejunum in broiler chicks

| Time after placement (h) | Time of feed deprivation (h) |                   |                   | SEM   |
|--------------------------|------------------------------|-------------------|-------------------|-------|
|                          | 0                            | 24                | 48                |       |
| 0                        | 9.04                         | 9.33              | 8.90              | 0.534 |
| 24                       | 8.49                         | 7.89              | 8.07              | 0.548 |
| 48                       | 7.77                         | 8.62              | 8.98              | 0.583 |
| 72                       | 7.97                         | 7.66              | 7.88              | 0.451 |
| 120                      | 6.95                         | 6.96              | 6.53              | 0.370 |
| 168                      | 7.04 <sup>ab</sup>           | 7.21 <sup>a</sup> | 6.24 <sup>b</sup> | 0.308 |

VCR=villus height: crypt depth ratio

Mean values with their SEM (n 3). a,b,c Mean values within a row with unlike letters were significantly different (P < 0.05)

**Table S8.** Effects of feed deprivation on VCR of ileum in broiler chicks

| Time after placement (h) | Time of feed deprivation (h) |                   |                   | SEM   |
|--------------------------|------------------------------|-------------------|-------------------|-------|
|                          | 0                            | 24                | 48                |       |
| 0                        | 4.65                         | 4.60              | 4.70              | 0.380 |
| 24                       | 5.78                         | 5.39              | 5.18              | 0.644 |
| 48                       | 5.68                         | 5.20              | 5.25              | 0.309 |
| 72                       | 4.58 <sup>b</sup>            | 5.34 <sup>a</sup> | 4.74 <sup>b</sup> | 0.079 |
| 120                      | 5.27 <sup>ab</sup>           | 5.77 <sup>a</sup> | 4.56 <sup>b</sup> | 0.349 |

|     |      |      |      |       |
|-----|------|------|------|-------|
| 168 | 5.97 | 5.51 | 5.47 | 0.436 |
|-----|------|------|------|-------|

VCR=villus height: crypt depth ratio

Mean values with their SEM (n 3). a,b,c Mean values within a row with unlike letters were significantly different ( $P < 0.05$ )

**Table S9.** Relative gene expressions of occludin in jejunum on three groups at 0, 24, 48, 72, 120, 168 h after placement.

| Time after placement (h) | Time of feed deprivation (h) |                    |                    | SEM   |
|--------------------------|------------------------------|--------------------|--------------------|-------|
|                          | 0                            | 24                 | 48                 |       |
| 0                        | 1.007                        | 1.068              | 0.968              | 0.085 |
| 24                       | 1.012                        | 1.000              | 0.954              | 0.097 |
| 48                       | 1.013 <sup>a</sup>           | 0.864 <sup>b</sup> | 0.760 <sup>b</sup> | 0.066 |
| 72                       | 1.005                        | 1.020              | 0.949              | 0.097 |
| 120                      | 1.016                        | 0.976              | 0.878              | 0.085 |
| 168                      | 1.038 <sup>a</sup>           | 0.826 <sup>b</sup> | 0.833 <sup>b</sup> | 0.046 |

Mean values with their SEM (n 6). a, b, c Mean values within a row with unlike letters were significantly different ( $P < 0.05$ ).

**Table S10.** Relative gene expressions of occludin (a) and claudin-1 (b) in jejunum on three groups at 0, 24, 48, 72, 120, 168 h after placement.

| Time after placement (h) | Time of feed deprivation (h) |                     |                    | SEM   |
|--------------------------|------------------------------|---------------------|--------------------|-------|
|                          | 0                            | 24                  | 48                 |       |
| 0                        | 1.024                        | 0.971               | 1.047              | 0.103 |
| 24                       | 1.016 <sup>a</sup>           | 0.728 <sup>b</sup>  | 0.692 <sup>b</sup> | 0.084 |
| 48                       | 1.018 <sup>a</sup>           | 0.669 <sup>b</sup>  | 0.252 <sup>c</sup> | 0.085 |
| 72                       | 1.058                        | 0.991               | 1.015              | 0.080 |
| 120                      | 1.027                        | 0.914               | 0.921              | 0.076 |
| 168                      | 1.026 <sup>a</sup>           | 0.912 <sup>ab</sup> | 0.883 <sup>b</sup> | 0.051 |

Mean values with their SEM (n 6). a, b, c Mean values within a row with unlike letters were significantly different ( $P < 0.05$ ).

**Table S11.** Relative protein expressions of occludin in jejunum on three groups at 0, 24, 48, 72, 120, 168 h after placement.

| Time after placement (h) | Time of feed deprivation (h) |                     |                    | SEM   |
|--------------------------|------------------------------|---------------------|--------------------|-------|
|                          | 0                            | 24                  | 48                 |       |
| 0                        | 72.69                        | 73.44               | 74.54              | 4.709 |
| 24                       | 77.81                        | 68.35               | 79.60              | 7.369 |
| 48                       | 139.3 <sup>a</sup>           | 87.14 <sup>b</sup>  | 40.47 <sup>c</sup> | 6.948 |
| 72                       | 88.80                        | 90.95               | 92.37              | 6.081 |
| 120                      | 75.71                        | 76.13               | 65.92              | 4.448 |
| 168                      | 73.78 <sup>a</sup>           | 58.14 <sup>ab</sup> | 43.61 <sup>b</sup> | 7.120 |

Mean values with their SEM (n 6). a, b, c Mean values within a row with unlike letters were significantly different ( $P < 0.05$ ).

**Table S12.** Relative protein expressions of claudin-1 in jejunum on three groups at 0, 24, 48, 72, 120, 168 h after placement.

| Time after placement (h) | Time of feed deprivation (h) |                    |                    | SEM   |
|--------------------------|------------------------------|--------------------|--------------------|-------|
|                          | 0                            | 24                 | 48                 |       |
| 0                        | 76.59                        | 78.60              | 80.59              | 3.440 |
| 24                       | 86.87 <sup>a</sup>           | 55.13 <sup>b</sup> | 62.94 <sup>b</sup> | 3.039 |
| 48                       | 205.4 <sup>a</sup>           | 67.69 <sup>b</sup> | 40.58 <sup>c</sup> | 6.660 |
| 72                       | 84.12 <sup>a</sup>           | 61.38 <sup>b</sup> | 53.04 <sup>b</sup> | 3.845 |
| 120                      | 62.26                        | 53.77              | 64.54              | 4.500 |
| 168                      | 105.4 <sup>a</sup>           | 87.33 <sup>a</sup> | 46.31 <sup>b</sup> | 6.320 |

Mean values with their SEM (n 6). a, b, c Mean values within a row with unlike letters were significantly different ( $P < 0.05$ ).

**Table S13.** Effects of initial feeding time on growth performance and feed utilization in broilers.

| Items      | Group              |                     |                    | SEM   |
|------------|--------------------|---------------------|--------------------|-------|
|            | A                  | B                   | C                  |       |
| 1-7d       |                    |                     |                    |       |
| 1d BW(g)   | 42.97              | 43.03               | 42.89              | 0.378 |
| 7d BW(g)   | 123.8 <sup>a</sup> | 111.6 <sup>b</sup>  | 97.79 <sup>c</sup> | 1.109 |
| ADG (g/d)  | 11.61 <sup>a</sup> | 9.79 <sup>b</sup>   | 7.84 <sup>c</sup>  | 0.161 |
| ADFI (g/d) | 14.73 <sup>a</sup> | 13.95 <sup>a</sup>  | 10.22 <sup>b</sup> | 0.383 |
| F/G        | 1.269 <sup>b</sup> | 1.425 <sup>a</sup>  | 1.303 <sup>b</sup> | 0.031 |
| 1-21d      |                    |                     |                    |       |
| 21d BW (g) | 474.1 <sup>a</sup> | 455.0 <sup>ab</sup> | 421.1 <sup>b</sup> | 14.51 |
| ADG (g/d)  | 20.53 <sup>a</sup> | 19.62 <sup>ab</sup> | 18.02 <sup>b</sup> | 0.685 |
| ADFI (g/d) | 28.45 <sup>a</sup> | 27.00 <sup>ab</sup> | 25.76 <sup>b</sup> | 0.886 |
| F/G        | 1.386 <sup>b</sup> | 1.376 <sup>b</sup>  | 1.430 <sup>a</sup> | 0.015 |
| 22-50d     |                    |                     |                    |       |
| 50d BW(g)  | 1744               | 1723                | 1674               | 61.51 |
| ADG (g/d)  | 44.19              | 43.74               | 42.84              | 1.705 |
| ADFI (g/d) | 111.6              | 109.3               | 106.7              | 3.124 |
| F/G        | 2.530              | 2.500               | 2.493              | 0.040 |
| 1-50d      |                    |                     |                    |       |
| ADG (g/d)  | 34.02              | 33.61               | 32.61              | 1.229 |
| ADFI (g/d) | 74.33              | 72.90               | 70.97              | 2.231 |
| F/G        | 2.188              | 2.170               | 2.178              | 0.021 |

Mean values with their SEM (n=6). a, b, c Mean values within a row with unlike letters were significantly different ( $P < 0.05$ ).

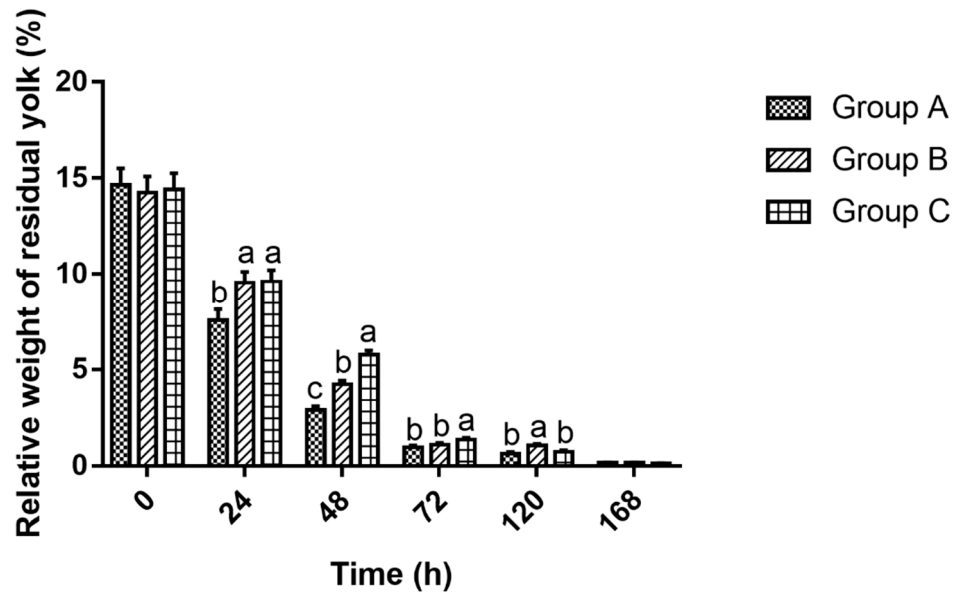

**Figure S1.** Effects of feed deprivation on relative weight of residual yolk in broiler chicks (n 6). a,b,c Mean values within a row with unlike letters were significantly different ( $P < 0.05$ ).

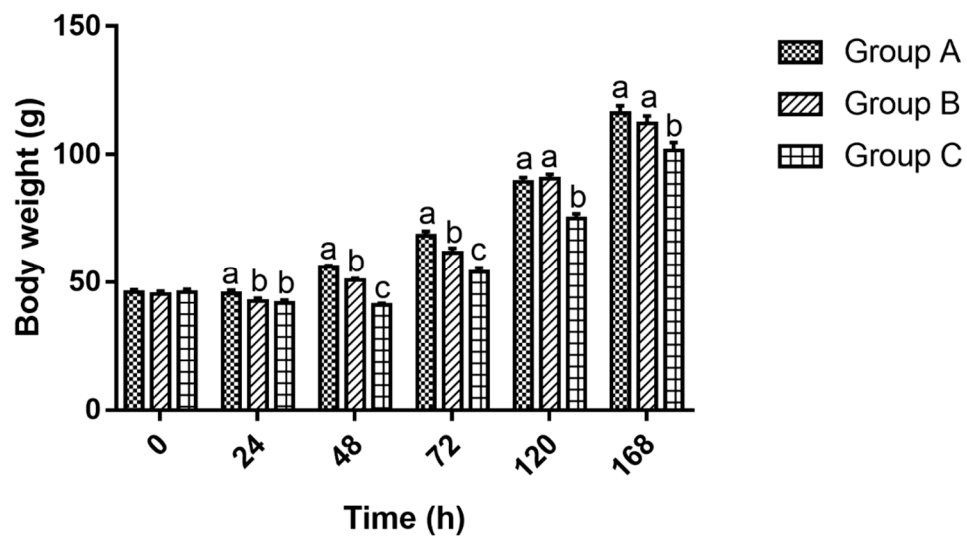

**Figure S2.** Effects of feed deprivation on body weight. Mean values with their SEM (n=6). a,b,c Mean values within a row with unlike letters were significantly different ( $P < 0.05$ ).
